# Supplementary material for: High fuel production rate and excellent durability for photothermocatalytic CO2 reduction achieved via the surface plasma effect of NiCu alloy nanoparticles
Source: Royal Society of Chemistry journal article supplement (doi:10.1039/d2cy02027k), 2023-01-01
Supplement: d2cy02027k1.pdf [file d2cy02027k1.pdf]

## Supporting Information

### High Fuel Production Rate and Excellent Durability for Photothermocatalytic CO<sub>2</sub> Reduction

#### Achieved by Surface Plasma Effect of NiCu Alloy Nanoparticles

*Guanrui Ji, Shaowen Wu\*, Jian Tian\**

School of Materials Science and Engineering, Shandong University of Science and Technology,

Qingdao 266590, China. Email: [swwu@sdust.edu.cn](mailto:swwu@sdust.edu.cn)

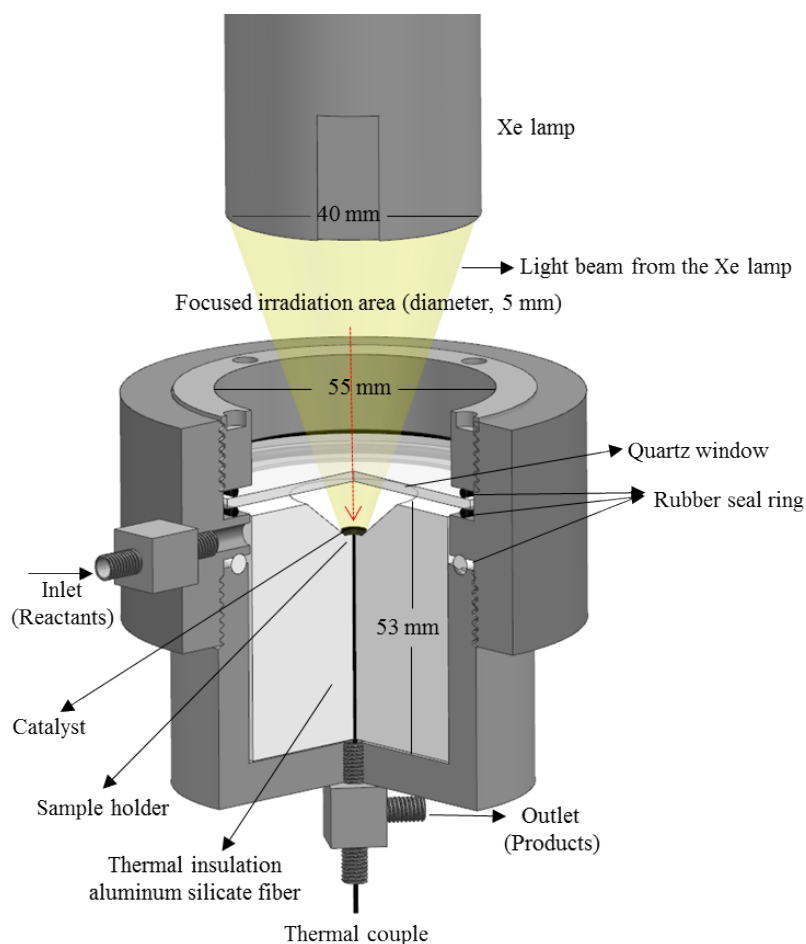

**Scheme S1.** Schematically illustrated home-made reactor for conducting photothermocatalytic CO<sub>2</sub> reduction by CH<sub>4</sub> on the samples under the focused irradiation from a 500 W Xe lamp without using additional electric heater.

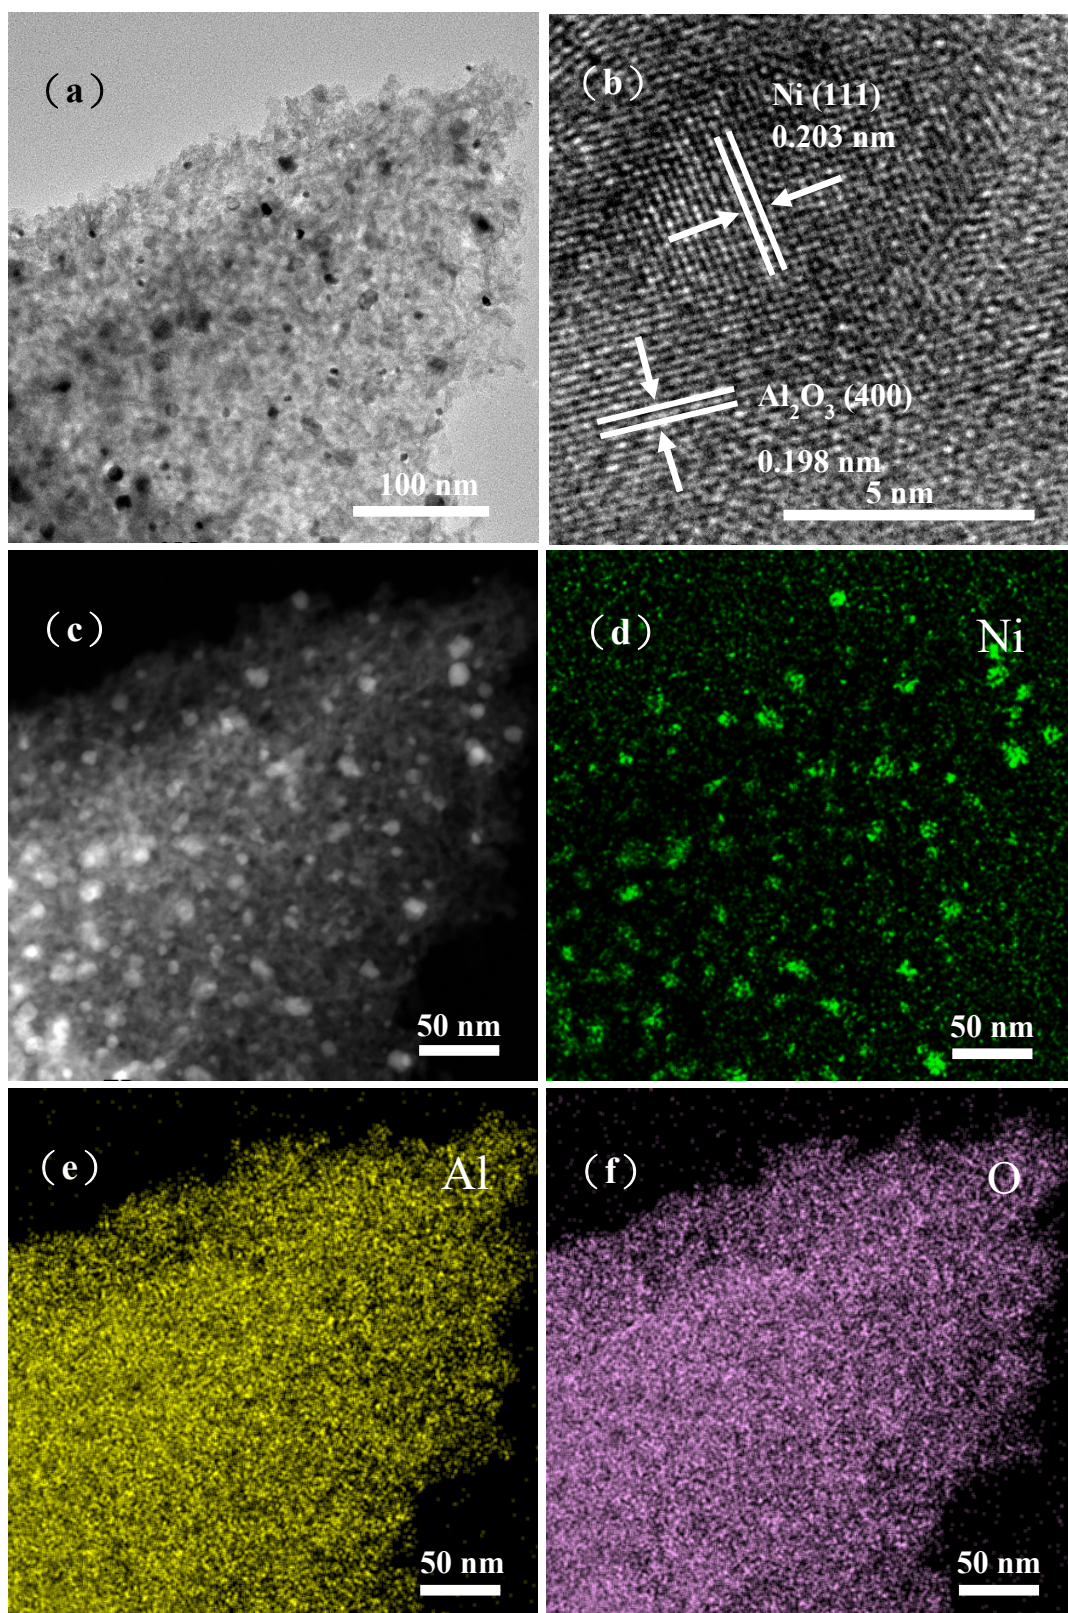

**Fig. S1.** Transmission electron microscopy (TEM) image (a) and high-resolution TEM image of Ni/Al<sub>2</sub>O<sub>3</sub> (b). HAADF image (c) and the element mappings of Ni (d), Al (e), and O (f) of

Ni/Al<sub>2</sub>O<sub>3</sub>.

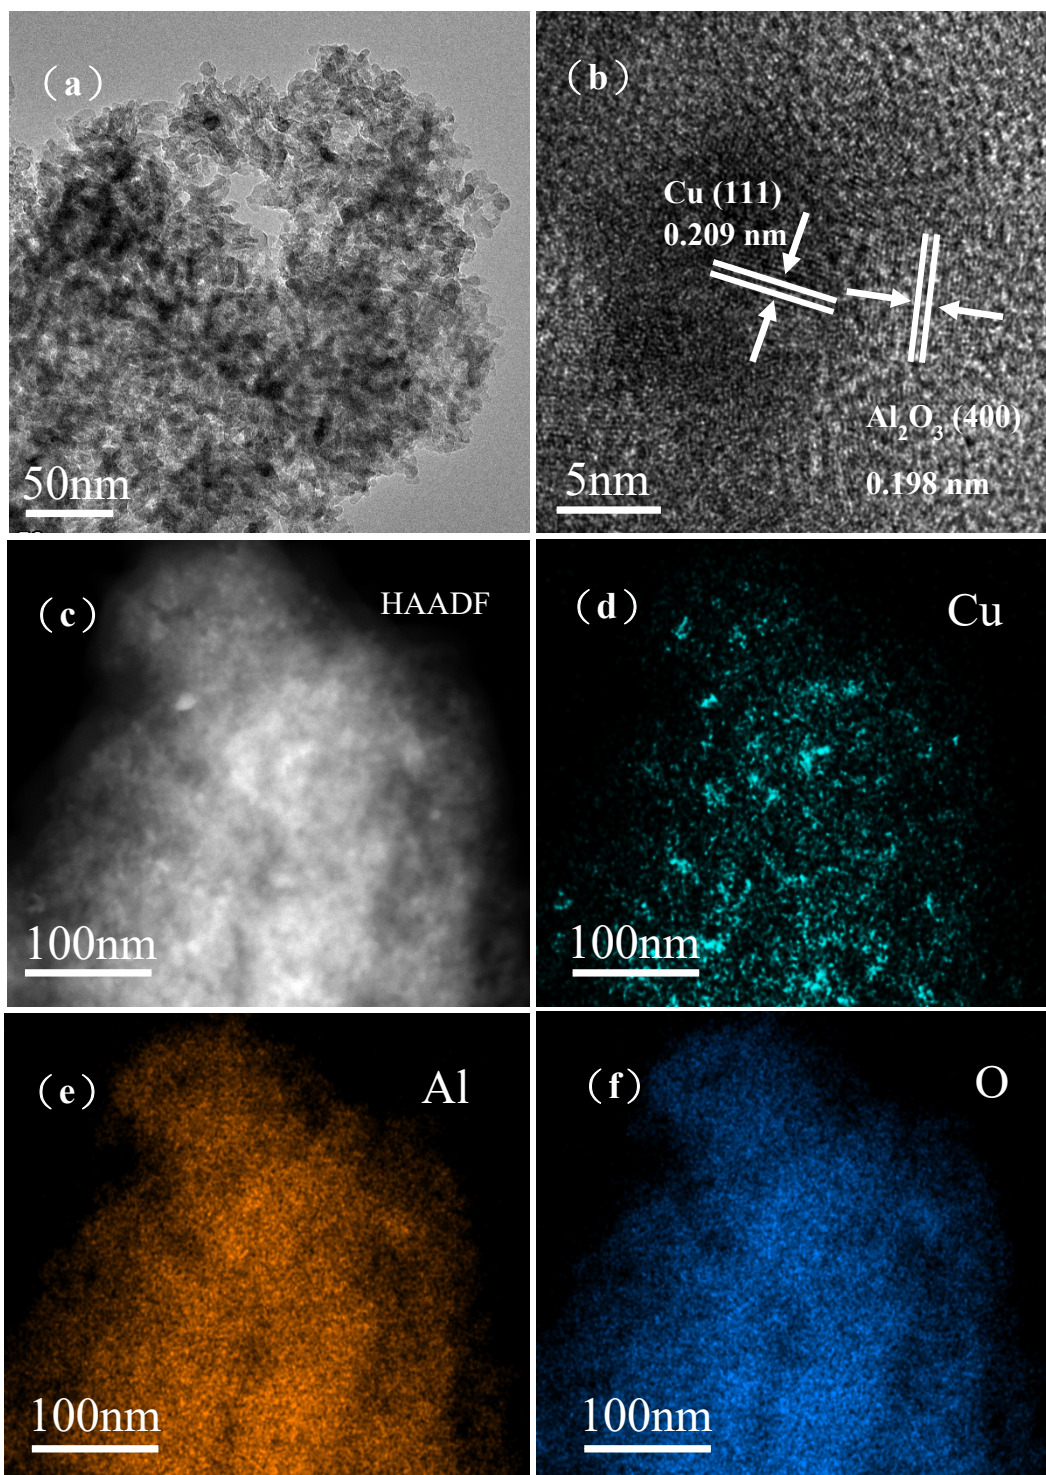

**Fig. S2.** Transmission electron microscopy (TEM) image (a) and high-resolution TEM image of Cu/Al<sub>2</sub>O<sub>3</sub> (b). HAADF image (c) and the element mappings of Cu (d), Al (e), and O (f) of

Cu/Al<sub>2</sub>O<sub>3</sub>.

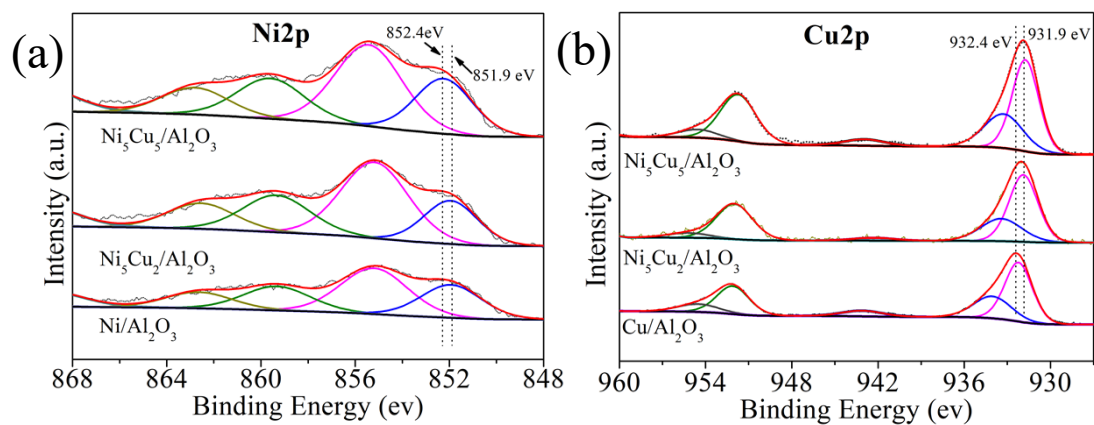

**Fig. S3.** XPS spectra of Ni 2p<sub>3/2</sub> (a) and Cu 2p<sub>3/2</sub> (b) in Ni<sub>5</sub>Cu<sub>5</sub>/Al<sub>2</sub>O<sub>3</sub>, Ni<sub>5</sub>Cu<sub>2</sub>/Al<sub>2</sub>O<sub>3</sub>, Ni/Al<sub>2</sub>O<sub>3</sub> and Cu/Al<sub>2</sub>O<sub>3</sub>.

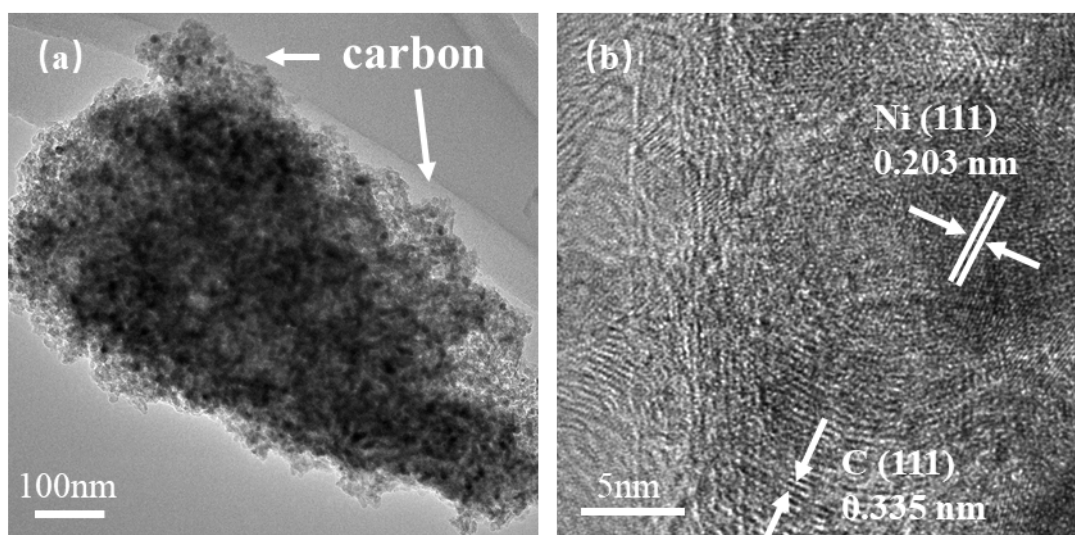

**Fig. S4.** TEM image (a) and HRTEM image (b) of the used Ni/Al<sub>2</sub>O<sub>3</sub> sample after 50 h photothermocatalytic durability test.

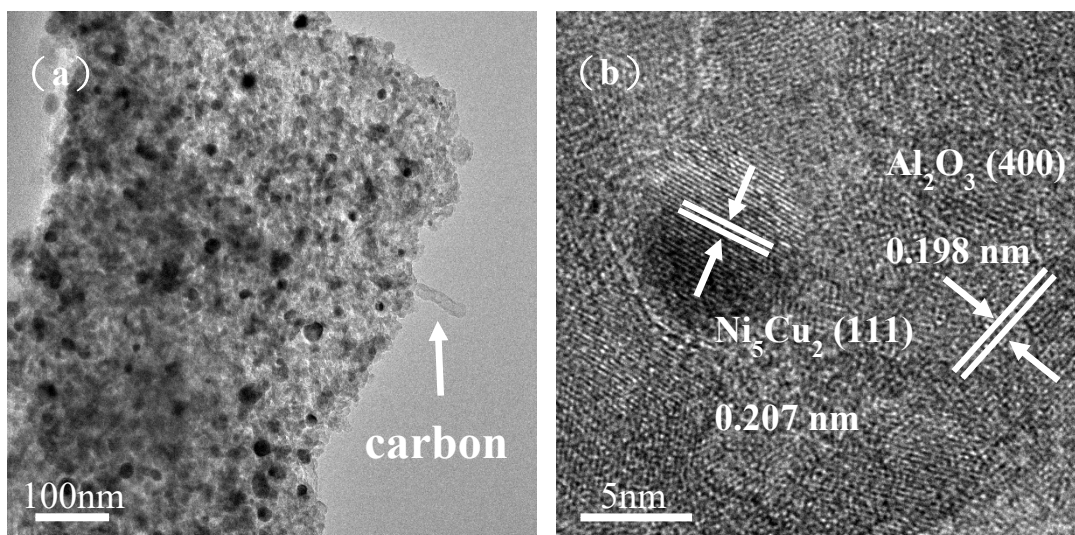

**Fig. S5.** TEM image (a) and HRTEM image (b) of the used  $\text{Ni}_5\text{Cu}_2/\text{Al}_2\text{O}_3$  sample after 50 h photothermocatalytic durability test.

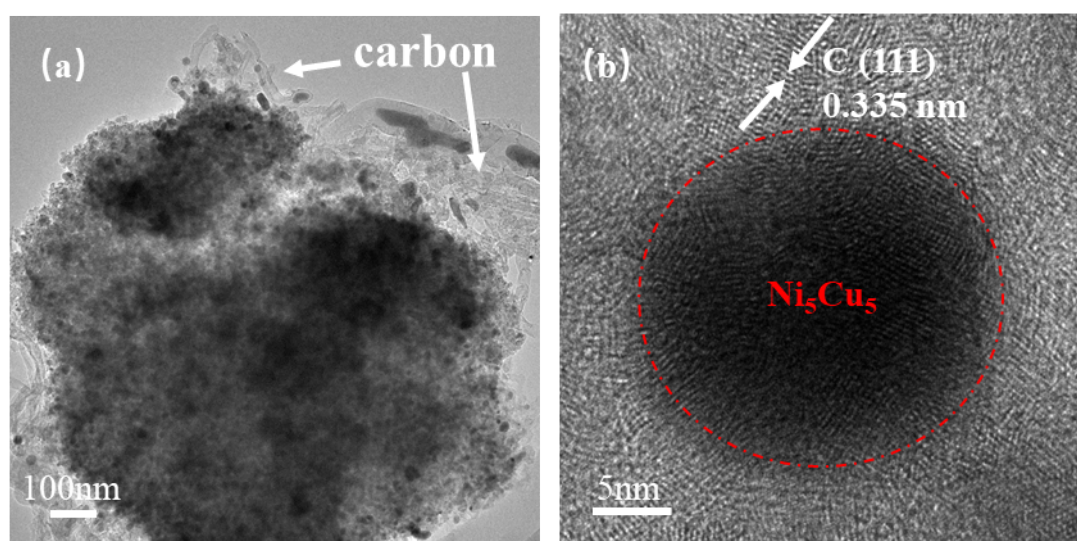

**Fig. S6.** TEM image (a) and HRTEM image (b) of the used  $\text{Ni}_5\text{Cu}_5/\text{Al}_2\text{O}_3$  sample after 50 h photothermocatalytic durability test.
